# Supplementary material for: Seeing through the Sea with Satellites: Reconstructing Ocean Subsurface Temperature and Salinity with Satellite Observations
Source: Copernicus journal article supplement (doi:10.5194/essd-2024-334), 2024-08-22
Supplement: Supplementary file 1 [file essd-2024-334-supplement.pdf]

1  
2  
3  
4  
5  
6  
7  
8  
9  
10  
11  
12  
13  
14  
15  
16  
17  
18  
19  
20  
21  
22  
23  
24  
25  
26  
27  
28  
29  
30  
31  
32  
33  
34

# Supplement for

## **Seeing through the Sea with Satellites: Reconstructing Ocean Subsurface Temperature and Salinity with Satellite Observations**

Shizuo Liu and Shineng Hu \*

Nicholas School of the Environment, Duke University, Durham, NC, USA

\* Corresponding author. Email: [shineng.hu@duke.edu](mailto:shineng.hu@duke.edu)

**This PDF file includes:**

Fig. S1 to S6

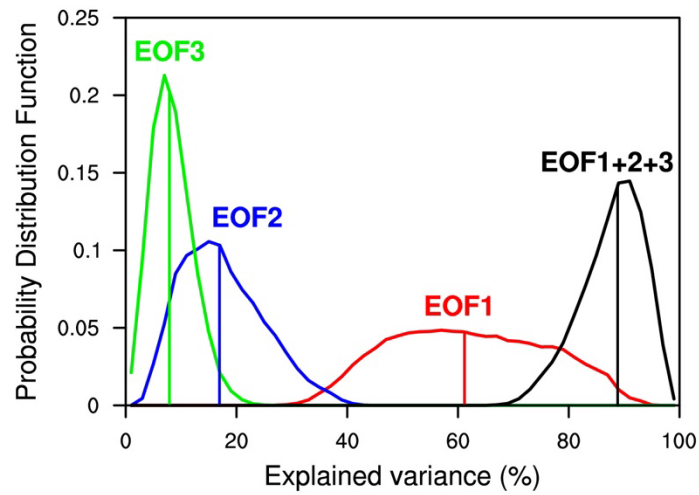

35

36 **Figure S1.** Probability distribution function for the explained variance of EOF1 (red  
 37 curve), EOF2 (blue curve), EOF3 (green curve) and the sum of the first three EOFs  
 38 (black curve) for the global ocean. Instead of grid number-based, each grid is weighted  
 39 by its area weight (see Data and Methods for details). The solid vertical lines show the  
 40 median levels of the explained variance of each EOF or the sum of the first three EOFs.

41

42

43

44

45

46

47

48

49

50

51

52

53

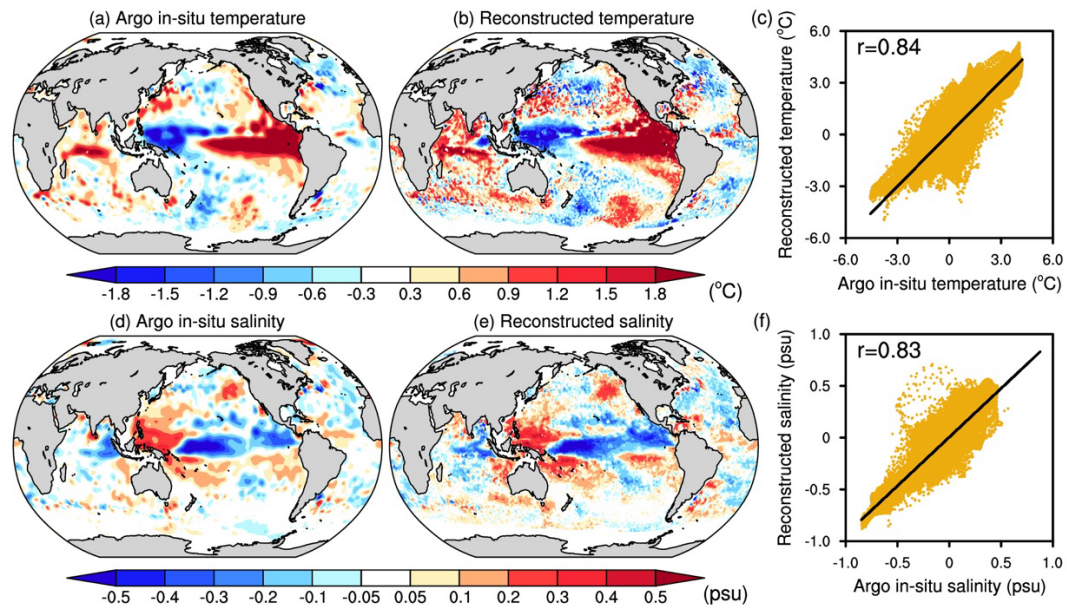

54

55

56 **Figure S2.** Comparisons of the spatial distribution of Argo in-situ (left column) and  
 57 reconstructed (middle column) ocean subsurface temperature (a, b) and salinity (d, e)  
 58 anomalies for the average of 1-100 m in January 2016 at 0.25° x 0.25° resolution.  
 59 Scatter plots (right column) of Argo in-situ versus reconstructed temperature anomalies  
 60 (c) and salinity anomalies (f) for all the global grids in January 2016. The correlation  $r$   
 61 between Argo in-situ data and reconstruction is shown in the left-upper side of each  
 62 panel.

63

64

65

66

67

68

69

70

71

72

73

74

75

76

77

78

79

80

81

82

83

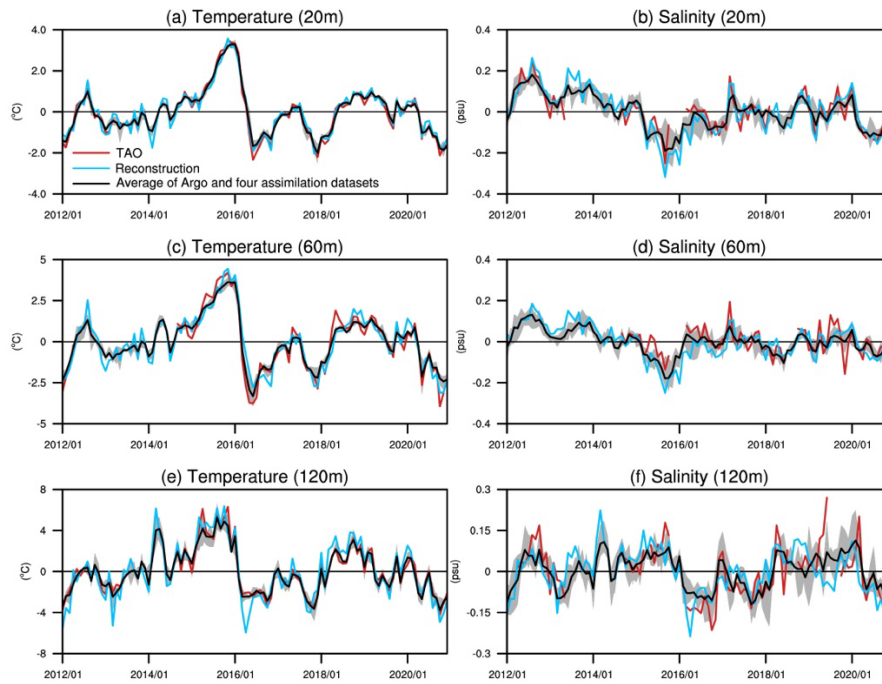

84

85 **Figure S3.** Comparisons between TAO/TRITON, our reconstruction, and other  
 86 subsurface datasets at the site of EQ, 140° W for the depths at 20 m, 60 m and  
 87 120 m. The TAO/ TRITON time series is represented by the red curve, the reconstructed time  
 88 series by the blue curve, and the average of Argo in-situ data and four assimilation data  
 89 (ORAS5, SODA3, ECCO4r4, IAP) is depicted by the black curve. The gray shading  
 90 curve denotes one standard deviation across the Argo, ORAS5, SODA3, ECCO4r4, and  
 91 IAP datasets.

92

93

94

95

96

97

98

99

100

101

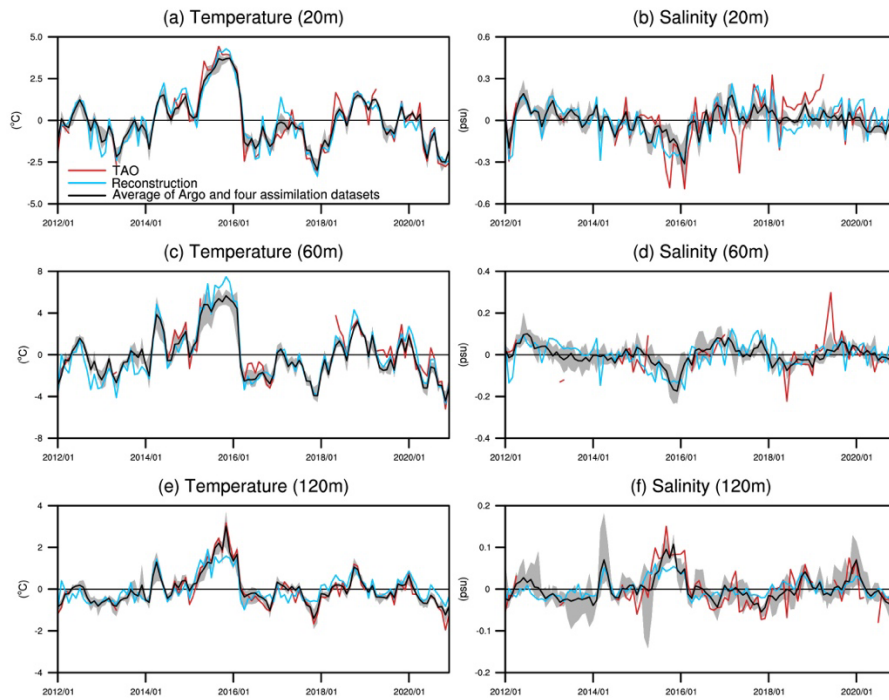

102

103 **Figure S4.** Comparisons between TAO/TRITON, our reconstruction, and other  
 104 subsurface datasets at the site of EQ, 110° W for the depths at 20 m, 60 m and 120 m.  
 105 The TAO/ TRITON time series is represented by the red curve, the reconstructed time  
 106 series by the blue curve, and the average of Argo in-situ data and four assimilation data  
 107 (ORAS5, SODA3, ECCO4r4, IAP) is depicted by the black curve. The gray shading  
 108 curve denotes one standard deviation across the Argo, ORAS5, SODA3, ECCO4r4, and  
 109 IAP datasets.

110

111

112

113

114

115

116

117

118

119

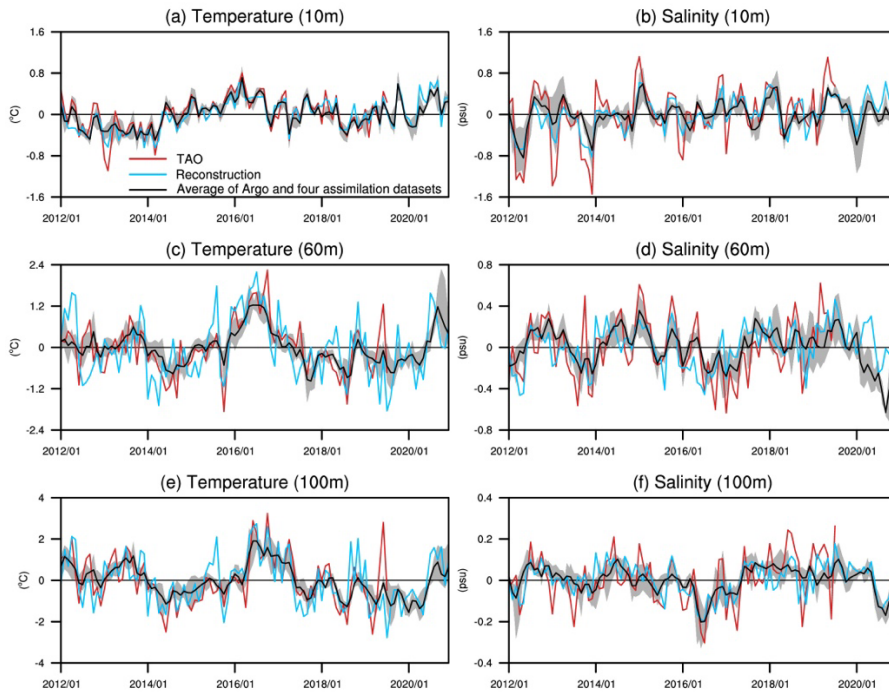

120

121 **Figure S5.** Comparisons between TAO/TRITON, our reconstruction, and other  
 122 subsurface datasets at the site of 15° N, 90° E for the depths at 10 m, 60 m and 100 m.  
 123 The TAO/ TRITON time series is represented by the red curve, the reconstructed time  
 124 series by the blue curve, and the average of Argo in-situ data and four assimilation data  
 125 (ORAS5, SODA3, ECCO4r4, IAP) is depicted by the black curve. The gray shading  
 126 curve denotes one standard deviation across the Argo, ORAS5, SODA3, ECCO4r4, and  
 127 IAP datasets.

128

129

130

131

132

133

134

135

136

137

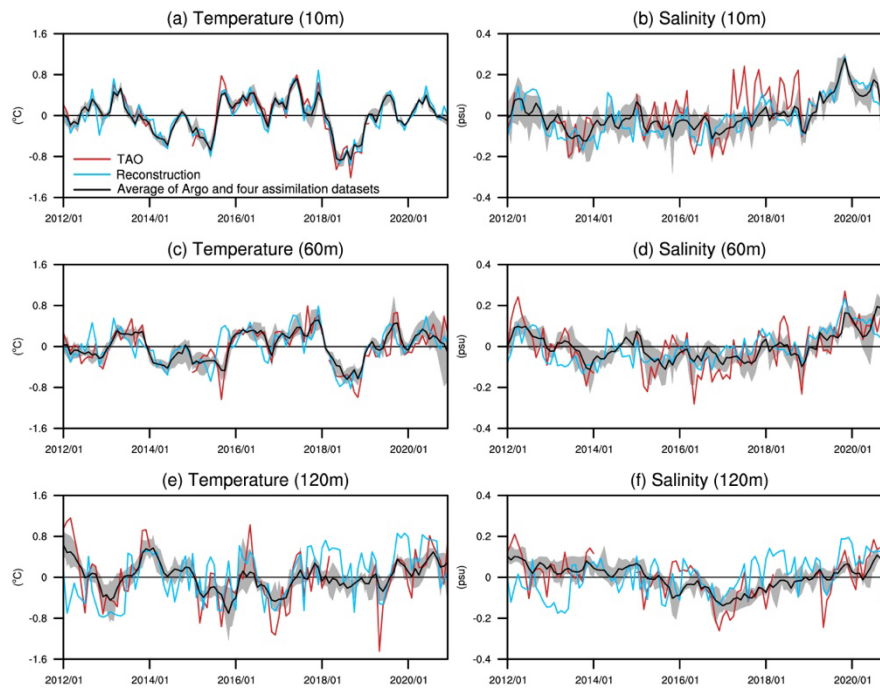

138

139 **Figure S6.** Comparisons between TAO/TRITON, our reconstruction, and other  
 140 subsurface datasets at the site of 20° N, 142° W for the depths at 10 m, 60 m and 120  
 141 m. The TAO/ TRITON time series is represented by the red curve, the reconstructed  
 142 time series by the blue curve, and the average of Argo in-situ data and four assimilation  
 143 data (ORAS5, SODA3, ECCO4r4, IAP) is depicted by the black curve. The gray  
 144 shading curve denotes one standard deviation across the Argo, ORAS5, SODA3,  
 145 ECCO4r4, and IAP datasets.

146

147

148

149

150
